# Supplementary material for: Phase I study of a multitargeted recombinant Ad5 PSA/MUC-1/brachyury-based immunotherapy vaccine in patients with metastatic castration-resistant prostate cancer (mCRPC)
Source: PubMed Central journal article supplement — J Immunother Cancer. 2021 Mar 24;9(3):e002374. doi: 10.1136/jitc-2021-002374 (PMC7993215; doi:10.1136/jitc-2021-002374), 2021-03-24
Supplement: jitc-2021-002374supp001.pdf [file jitc-2021-002374supp001.pdf]

## Supplemental Table 1

| Anti-Ad-5 Neutralizing Antibody Titer      | Pre           | Post 1 Vaccine | Post 2 Vaccines | Post 3 Vaccines | Post 4 or 5 Vaccines |
|--------------------------------------------|---------------|----------------|-----------------|-----------------|----------------------|
| Positive at $\geq 1:100$ serum dilution    | 3/18<br>(17%) | 4/5<br>(80%)   | 17/17<br>(100%) | 15/15<br>(100%) | 5/5<br>(100%)        |
| Positive at $\geq 1:500$ serum dilution    | 3/18<br>(17%) | 1/5<br>(20%)   | 14/17<br>(82%)  | 15/15<br>(100%) | 5/5<br>(100%)        |
| Positive at $\geq 1:1,000$ serum dilution  | 1/18<br>(6%)  | 1/5<br>(20%)   | 9/17<br>(53%)   | 8/15<br>(53%)   | 5/5<br>(100%)        |
| Positive at $\geq 1:5,000$ serum dilution  | 0/18<br>(0%)  | 1/5<br>(20%)   | 5/17<br>(29%)   | 6/15<br>(40%)   | 3/5<br>(60%)         |
| Positive at $\geq 1:10,000$ serum dilution | 0/18<br>(0%)  | 1/5<br>(20%)   | 3/17<br>(18%)   | 2/15<br>(13%)   | 2/5<br>(40%)         |

**Supplemental Table 1:** Frequency of patients with anti-Ad5 Neutralizing Antibodies Pre and post vaccination.

## Supplemental Table 2

| Serum Soluble Factor and Cytokines | Patients with PSA Decline |               | Patient without PSA Decline |               |
|------------------------------------|---------------------------|---------------|-----------------------------|---------------|
|                                    | Increase >10%             | Decrease >10% | Increase >10%               | Decrease >10% |
| sCD40L                             | 1/5<br>(20%)              | 4/5<br>(80%)  | 6/13<br>(46%)               | 1/13<br>(8%)  |
| IL-8                               | 5/5<br>(100%)             | 0/5<br>(0%)   | 5/13<br>(38%)               | 8/13<br>(62%) |

**Supplemental Table 2:** Frequency of patients with a >10% change (increase or decrease) in soluble CD40L (sCD40L) or interleukin-8 (IL-8) at 3 or 6 weeks post vaccination.

## Supplemental Figure 1

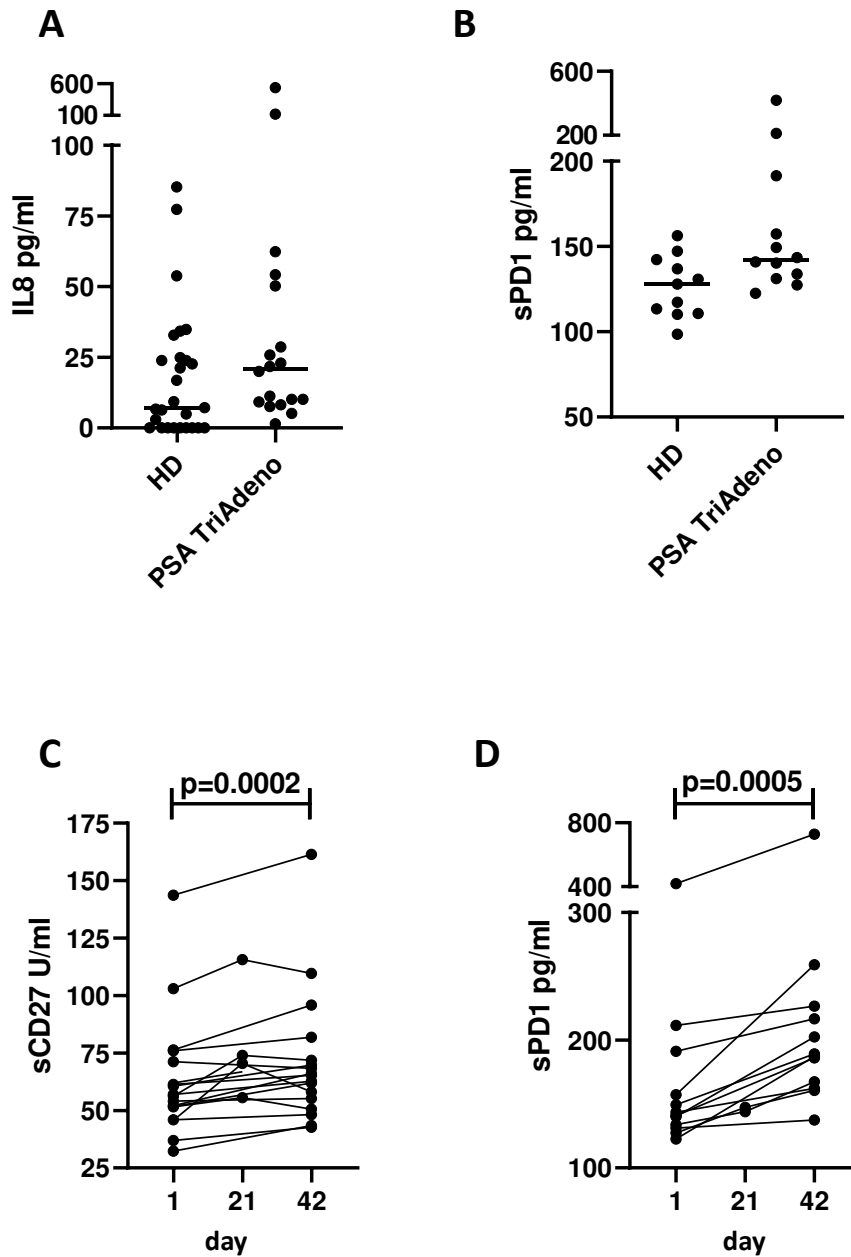

**Supplemental Figure 1: Level of Serum Analytes.** **A, B.** Levels of interleukin-8 (IL-8) and soluble PD-1 (sPD1) were statistically significantly elevated at baseline in cancer patients enrolled on this study compared to healthy donors (HD). **C, D.** Levels of soluble CD27 (sCD27) and sPD1 were significantly increased at 42 days (post 2 vaccinations) compared to pre (day 1).
